# Supplementary material
Source: publisher site journal article supplement (https://nl.pensoft.net/article/33190/download/suppl/33/)
Supplement: Supplementary file 1

**Supplement 3**. **List of specimens-ID (from BOLD database) and GenBank accession numbers of the analyzed Zygaenidae vouchers:**

**DNA barcoding of Zygaenidae moths [ZYGMO] (COI-5P, Length > 550).**

| **Species names** | **BOLD process ID number** | **Sex** | **Origin of material** | **GenBank accession**  **number** |
| --- | --- | --- | --- | --- |
| *Acoloithus* n sp. 1 | ZYGMO769-13 | Female | Mexico | MK930536 |
| *Acoloithus novaricus* | ZYGMO764-13 | Male | USA | MK930535 |
| *Acoloithus novaricus* | ZYGMO763-13 | Male | USA | MK930534 |
| *Acoloithus rectarius* | ZYGMO767-13 | Female | USA | MK930539 |
| *Acoloithus rectarius* | ZYGMO766-13 | Female | USA | MK930538 |
| *Acoloithus rectarius* | ZYGMO765-13 | Male | USA | MK930537 |
| *Acoloithus totusniger* | ZYGMO768-13 | Male | Costa Rica | MK930540 |
| *Adscita albanica* | ZYGMO093-09 | Female | Crimea | GU705648 |
| *Adscita albanica* | ZYGMO092-09 | Male | Crimea | GU705651 |
| *Adscita alpina* | ZYGMO238-10 | Male | Italy | HQ584931 |
| *Adscita alpina* | ZYGMO237-10 | Male | Italy | HQ584930 |
| *Adscita alpina* | ZYGMO441-10 | Male | Italy | HQ987581 |
| *Adscita alpina* x *Adscita statices* (hybrid) | ZYGMO442-10 | Male | Italy | HQ987582 |
| *Adscita amaura* | ZYGMO1005-14 | Male | Uzbekistan | MK930544 |
| *Adscita amaura* | ZYGMO1003-14 | Female | Uzbekistan | MK930543 |
| *Adscita amaura* | ZYGMO1002-14 | Female | Tajikistan | MK930541 |
| *Adscita amaura* | ZYGMO1001-14 | Male | Tajikistan | MK930542 |
| *Adscita bolivari* | ZYGMO100-09 | Female | Spain | GU705771 |
| *Adscita bolivari* | ZYGMO096-09 | Male | Spain | HM386566 |
| *Adscita bolivari* | ZYGMO097-09 | Male | Spain | HM386567 |
| *Adscita bolivari* | ZYGMO098-09 | Male | Spain | GU705773 |
| *Adscita bolivari* | ZYGMO099-09 | Female | Spain | GU705774 |
| *Adscita capitalis* | ZYGMO085-09 | Female | Turkey | GU705657 |
| *Adscita capitalis* | ZYGMO082-09 | Male | Turkey | GU705659 |
| *Adscita capitalis* | ZYGMO081-09 | Male | Turkey | GU705658 |
| *Adscita capitalis* | ZYGMO084-09 | Female | Turkey | GU705786 |
| *Adscita capitalis* | ZYGMO083-09 | Male | Turkey | GU705656 |
| *Adscita dujardini* | ZYGMO1179-15 | Male | Italy | MK930553 |
| *Adscita dujardini* | ZYGMO1178-15 | Male | Italy | MK930555 |
| *Adscita dujardini* | ZYGMO1177-15 | Male | Italy | MK930548 |
| *Adscita dujardini* | ZYGMO665-13 | Male | Italy | MK930547 |
| *Adscita dujardini* | ZYGMO977-14 | Male | Italy | MK930549 |
| *Adscita dujardini* | ZYGMO976-14 | Male | Italy | MK930545 |
| *Adscita dujardini* | ZYGMO975-14 | Male | Italy | MK930546 |
| *Adscita dujardini* | ZYGMO978-14 | Male | France | MK930550 |
| *Adscita dujardini* | ZYGMO979-14 | Male | Italy | MK930551 |
| *Adscita dujardini* | ZYGMO664-13 | Male | Italy | MK930554 |
| *Adscita dujardini* | ZYGMO980-14 | Male | Italy | MK930552 |
| *Adscita geryon* | ZYGMO086-09 | Male | Spain | GU705787 |
| *Adscita geryon* | ZYGMO087-09 | Male | Crimea | GU705654 |
| *Adscita geryon* | ZYGMO088-09 | Male | Crimea | GU705655 |
| *Adscita geryon* | ZYGMO089-09 | Male | Crimea | GU705652 |
| *Adscita geryon* | ZYGMO090-09 | Male | Crimea | GU705653 |
| *Adscita geryon* | ZYGMO091-09 | Male | Crimea | GU705650 |
| *Adscita geryon* | ZYGMO1000-14 | Male | Austria | MK930556 |
| *Adscita geryon* | ZYGMO1117-14 | Female | Macedonia | MK930569 |
| *Adscita geryon* | ZYGMO249-10 | Male | France | HQ584942 |
| *Adscita geryon* | ZYGMO250-10 | Male | France | HQ584943 |
| *Adscita geryon* | ZYGMO251-10 | Female | France | HQ584944 |
| *Adscita geryon* | ZYGMO252-10 | Male | Austria | HQ584945 |
| *Adscita geryon* | ZYGMO253-10 | Male | Austria | HQ584946 |
| *Adscita geryon* | ZYGMO254-10 | Male | Austria | HQ584947 |
| *Adscita geryon* | ZYGMO255-10 | Male | Austria | HQ584948 |
| *Adscita geryon* | ZYGMO256-10 | Male | Italy | HQ584949 |
| *Adscita geryon* | ZYGMO257-10 | Female | Italy | HQ584950 |
| *Adscita geryon* | ZYGMO258-10 | Male | Austria | HQ584951 |
| *Adscita geryon* | ZYGMO259-10 | Male | Austria | HQ584952 |
| *Adscita geryon* | ZYGMO260-10 | Female | Austria | HQ584953 |
| *Adscita geryon* | ZYGMO261-10 | Male | Austria | HQ584954 |
| *Adscita geryon* | ZYGMO262-10 | Male | Italy | HQ584955 |
| *Adscita geryon* | ZYGMO263-10 | Male | Italy | KX048671 |
| *Adscita geryon* | ZYGMO264-10 | Female | Italy | HQ584956 |
| *Adscita geryon* | ZYGMO265-10 | Female | Italy | HQ584957 |
| *Adscita geryon* | ZYGMO266-10 | Male | Macedonia | HQ584958 |
| *Adscita geryon* | ZYGMO267-10 | Male | Macedonia | HQ584959 |
| *Adscita geryon* | ZYGMO268-10 | Male | Macedonia | HQ584960 |
| *Adscita geryon* | ZYGMO269-10 | Male | Macedonia | HQ584961 |
| *Adscita geryon* | ZYGMO448-10 | Male | Italy | HQ987588 |
| *Adscita geryon* | ZYGMO449-10 | Male | Macedonia | HQ987589 |
| *Adscita geryon* | ZYGMO450-10 | Female | Macedonia | HQ987590 |
| *Adscita geryon* | ZYGMO451-10 | Female | Macedonia | HQ987591 |
| *Adscita geryon* | ZYGMO982-14 | Male | Turkey | MK930568 |
| *Adscita geryon* | ZYGMO986-14 | Male | Italy | MK930567 |
| *Adscita geryon* | ZYGMO989-14 | Male | Switzerland | MK930565 |
| *Adscita geryon* | ZYGMO991-14 | Male | Serbia | MK930564 |
| *Adscita geryon* | ZYGMO994-14 | Male | Austria | MK930561 |
| *Adscita geryon* | ZYGMO995-14 | Male | Austria | MK930560 |
| *Adscita geryon* | ZYGMO997-14 | Male | Italy | MK930559 |
| *Adscita geryon* | ZYGMO998-14 | Male | Italy | MK930558 |
| *Adscita geryon* | ZYGMO999-14 | Male | Austria | MK930557 |
| *Adscita italica* | ZYGMO1182-15 | Female | Italy | MK930571 |
| *Adscita italica* | ZYGMO1180-15 | Male | Italy | MK930572 |
| *Adscita italica* | ZYGMO1181-15 | Male | Italy | MK930570 |
| *Adscita italica* | ZYGMO240-10 | Male | Italy | HQ584933 |
| *Adscita italica* | ZYGMO239-10 | Male | Italy | HQ584932 |
| *Adscita italica* | ZYGMO1171-15 | Male | Italy | MK930573 |
| *Adscita italica* | ZYGMO447-10 | Female | Turkey | HQ987587 |
| *Adscita italica* | ZYGMO072-09 | Female | Turkey | GU705783 |
| *Adscita italica* | ZYGMO070-09 | Male | Turkey | GU705782 |
| *Adscita italica* | ZYGMO071-09 | Male | Turkey | GU705664 |
| *Adscita jordani* | ZYGMO063-09 | Female | Spain | GU705670 |
| *Adscita jordani* | ZYGMO062-09 | Female | Spain | GU705669 |
| *Adscita jordani* | ZYGMO061-09 | Male | Spain | GU705672 |
| *Adscita jordani* | ZYGMO060-09 | Male | Spain | GU705671 |
| *Adscita jordani* | ZYGMO059-09 | Male | Spain | GU705673 |
| *Adscita mannii* | ZYGMO1173-15 | Female | Italy | MK930602 |
| *Adscita mannii* | ZYGMO1172-15 | Male | Italy | MK930601 |
| *Adscita mannii* | ZYGMO1143-14 | Male | Greece | MK930577 |
| *Adscita mannii* | ZYGMO1139-14 | Female | Greece | MK930578 |
| *Adscita mannii* | ZYGMO1137-14 | Male | Greece | MK930605 |
| *Adscita mannii* | ZYGMO1119-14 | Male | Albania | MK930580 |
| *Adscita mannii* | ZYGMO1118-14 | Male | Albania | MK930579 |
| *Adscita mannii* | ZYGMO445-10 | Male | Macedonia | HQ987585 |
| *Adscita mannii* | ZYGMO452-10 | Male | Macedonia | HQ987592 |
| *Adscita mannii* | ZYGMO277-10 | Male | Macedonia | HQ584969 |
| *Adscita mannii* | ZYGMO278-10 | Male | Macedonia | HQ584970 |
| *Adscita mannii* | ZYGMO279-10 | Male | Macedonia | HQ584971 |
| *Adscita mannii* | ZYGMO280-10 | Male | Macedonia | HQ584972 |
| *Adscita mannii* | ZYGMO1128-14 | Male | Greece | MK930583 |
| *Adscita mannii* | ZYGMO1124-14 | Male | Greece | MK930581 |
| *Adscita mannii* | ZYGMO1125-14 | Male | Greece | MK930582 |
| *Adscita mannii* | ZYGMO1010-14 | Male | Italy | MK930596 |
| *Adscita mannii* | ZYGMO094-09 | Male | France | GU705649 |
| *Adscita mannii* | ZYGMO1019-14 | Male | Italy | MK930587 |
| *Adscita mannii* | ZYGMO1014-14 | Female | Italy | MK930592 |
| *Adscita mannii* | ZYGMO1018-14 | Male | Italy | MK930588 |
| *Adscita mannii* | ZYGMO1016-14 | Male | Italy | MK930590 |
| *Adscita mannii* | ZYGMO1020-14 | Male | Italy | MK930586 |
| *Adscita mannii* | ZYGMO1009-14 | Male | Italy | MK930597 |
| *Adscita mannii* | ZYGMO987-14 | Female | Italy | MK930606 |
| *Adscita mannii* | ZYGMO1011-14 | Female | Italy | MK930595 |
| *Adscita mannii* | ZYGMO1012-14 | Male | Italy | MK930594 |
| *Adscita mannii* | ZYGMO1007-14 | Male | Italy | MK930599 |
| *Adscita mannii* | ZYGMO1185-15 | Male | Italy | MK930576 |
| *Adscita mannii* | ZYGMO1184-15 | Male | Italy | MK930575 |
| *Adscita mannii* | ZYGMO1183-15 | Male | Italy | MK930574 |
| *Adscita mannii* | ZYGMO1132-14 | Male | Bulgaria | MK930604 |
| *Adscita mannii* | ZYGMO1131-14 | Male | Bulgaria | MK930603 |
| *Adscita mannii* | ZYGMO1130-14 | Male | Greece | MK930585 |
| *Adscita mannii* | ZYGMO1129-14 | Male | Greece | MK930584 |
| *Adscita mannii* | ZYGMO095-09 | Male | France | GU705647 |
| *Adscita mannii* | ZYGMO1015-14 | Male | Italy | MK930591 |
| *Adscita mannii* | ZYGMO1013-14 | Male | Italy | MK930593 |
| *Adscita mannii* | ZYGMO1017-14 | Male | Italy | MK930589 |
| *Adscita mannii* | ZYGMO1006-14 | Male | Italy | MK930600 |
| *Adscita mannii* | ZYGMO1008-14 | Male | Italy | MK930598 |
| *Adscita mauretanica* | ZYGMO248-10 | Male | Morocco | HQ584941 |
| *Adscita mauretanica* | ZYGMO247-10 | Male | Morocco | HQ584940 |
| *Adscita mauretanica* | ZYGMO207-10 | Female | Morocco | HQ584913 |
| *Adscita mauretanica* | ZYGMO206-10 | Female | Morocco | HQ584912 |
| *Adscita mauretanica* | ZYGMO205-10 | Female | Morocco | HQ584911 |
| *Adscita mauretanica* | ZYGMO078-09 | Male | Morocco | GU705784 |
| *Adscita mauretanica* | ZYGMO077-09 | Female | Morocco | GU705660 |
| *Adscita mauretanica* | ZYGMO076-09 | Female | Morocco | GU705662 |
| *Adscita mauretanica* | ZYGMO208-10 | Female | Morocco | MK930607 |
| *Adscita mauretanica* | ZYGMO079-09 | Female | Morocco | GU705785 |
| *Adscita obscura* | ZYGMO080-09 | Male | Turkey | HM417802 |
| *Adscita obscura* | ZYGMO1120-14 | Male | Greece | MK930613 |
| *Adscita obscura* | ZYGMO1121-14 | Male | Greece | MK930614 |
| *Adscita obscura* | ZYGMO1122-14 | Female | Greece | MK930615 |
| *Adscita obscura* | ZYGMO1135-14 | Male | Bulgaria | MK930610 |
| *Adscita obscura* | ZYGMO1196-15 | Male | Iran | MK930611 |
| *Adscita obscura* | ZYGMO1197-15 | Male | Iran | MK930612 |
| *Adscita obscura* | ZYGMO270-10 | Male | Turkey | HQ584962 |
| *Adscita obscura* | ZYGMO271-10 | Female | Turkey | HQ584963 |
| *Adscita obscura* | ZYGMO272-10 | Male | Turkey | HQ584964 |
| *Adscita obscura* | ZYGMO273-10 | Male | Turkey | HQ584965 |
| *Adscita obscura* | ZYGMO274-10 | Male | Iran | HQ584966 |
| *Adscita obscura* | ZYGMO275-10 | Female | Iran | HQ584967 |
| *Adscita obscura* | ZYGMO276-10 | Male | Iran | HQ584968 |
| *Adscita obscura* | ZYGMO209-10 | Male | Turkey | HQ987488 |
| *Adscita pligori* | ZYGMO204-10 | Female | Afghanistan | HQ584910 |
| *Adscita pligori* | ZYGMO203-10 | Male | Afghanistan | HQ584909 |
| *Adscita pligori* | ZYGMO202-10 | Male | Afghanistan | HQ584908 |
| *Adscita schmidti* | ZYGMO069-09 | Female | Spain | GU705663 |
| *Adscita schmidti* | ZYGMO067-09 | Male | Spain | GU705665 |
| *Adscita schmidti* | ZYGMO068-09 | Female | Spain | GU705666 |
| *Adscita schmidti* | ZYGMO066-09 | Male | Spain | GU705668 |
| *Adscita schmidti* | ZYGMO065-09 | Male | Spain | GU705667 |
| *Adscita statices* | ZYGMO1127-14 | Male | Greece | MK930616 |
| *Adscita statices* | ZYGMO1126-14 | Male | Greece | MK930619 |
| *Adscita statices* | ZYGMO246-10 | Male | Macedonia | HQ584939 |
| *Adscita statices* | ZYGMO244-10 | Male | Serbia | HQ584937 |
| *Adscita statices* | ZYGMO446-10 | Female | Macedonia | HQ987586 |
| *Adscita statices* | ZYGMO245-10 | Male | Serbia | HQ584938 |
| *Adscita statices* | ZYGMO444-10 | Female | Serbia | HQ987584 |
| *Adscita statices* | ZYGMO074-09 | Male | Turkey | MK930617 |
| *Adscita statices* | ZYGMO073-09 | Male | Turkey | GU705661 |
| *Adscita statices* | ZYGMO243-10 | Male | Serbia | HQ584936 |
| *Adscita statices* | ZYGMO242-10 | Female | Austria | HQ584935 |
| *Adscita statices* | ZYGMO241-10 | Male | Austria | HQ584934 |
| *Adscita statices* | ZYGMO443-10 | Female | Austria | HQ987583 |
| *Adscita subdolosa* | ZYGMO058-09 | Female | Tajikistan | HM417801 |
| *Adscita subdolosa* | ZYGMO057-09 | Male | Kyrgyzstan | HM417800 |
| *Adscita subtristis* | ZYGMO559-12 | Female | Tajikistan | MK930620 |
| *Adscita subtristis* | ZYGMO558-12 | Female | Tajikistan | MK930621 |
| *Adscita subtristis* | ZYGMO056-09 | Male | Kyrgyzstan | GU705674 |
| *Adscita subtristis* | ZYGMO054-09 | Male | Kyrgyzstan | GU705675 |
| *Adscita subtristis* | ZYGMO055-09 | Male | Kyrgyzstan | GU705676 |
| *Aethioprocris togoensis* | ZYGMO954-14 | Male | Ghana | MK930622 |
| *Agalope eronioides* | ZYGMO645-13 | Male | China | MK930623 |
| *Agalope eronioides* | ZYGMO644-13 | Male | Myanmar | MK930624 |
| *Aglaope infausta* | ZYGMO228-10 | Male | Spain | KX045899 |
| *Aglaope infausta* | ZYGMO227-10 | Male | Spain | HQ584922 |
| *Aglaope infausta* | ZYGMO225-10 | Male | Spain | HQ584921 |
| *Alteramenelikia* sp. 1 | ZYGMO956-14 | Female | Ghana | MK930627 |
| *Alteramenelikia* sp. 1 | ZYGMO955-14 | Female | Ghana | MK930626 |
| *Alteramenelikia* sp. 2 | ZYGMO957-14 | Male | Ghana | MK930628 |
| *Amesia aliris* | ZYGMO597-13 | Female | Myanmar | MK930630 |
| *Amesia aliris* | ZYGMO596-13 | Male | Myanmar | MK930629 |
| *Artona* sp. 1 | ZYGMO561-12 | Female | Thailand | MK930633 |
| *Artona* sp. 1 | ZYGMO560-12 | Male | Thailand | MK930632 |
| *Astyloneura assimilis* | ZYGMO669-13 | Female | Democratic Republic of the Congo | MK930637 |
| *Astyloneura* sp. | ZYGMO667-13 | Male | Burundi | MK930638 |
| *Australartona mirabilis* | ZYGMO513-12 | Male | Australia | MK930639 |
| *Barbaroscia amabilis* | ZYGMO599-13 | Female | Myanmar | MK930641 |
| *Barbaroscia amabilis* | ZYGMO598-13 | Female | Myanmar | MK930640 |
| Callizygaeninae sp.1 | ZYGMO961-14 | Male | Thailand | MK931150 |
| *Chalconycles* sp. 01 | ZYGMO729-13 | Female | Africa | MK930642 |
| *Chalcosia pectinicornis* | ZYGMO601-13 | Male | Myanmar | MK930643 |
| *Chalcosia pectinicornis* | ZYGMO600-13 | Male | Myanmar | MK930644 |
| *Chalcosia phalaenaria* | ZYGMO603-13 | Female | Myanmar | MK930646 |
| *Chalcosia phalaenaria* | ZYGMO602-13 | Male | Myanmar | MK930645 |
| Chalcosiinae sp.1 | ZYGMO595-13 | Male | Myanmar | MK930884 |
| *Chrysartona sinevi* | ZYGMO571-13 | Male | Myanmar | MK930647 |
| *Chrysartona* sp. 1 | ZYGMO1223-15 | Male | Thailand | MK930877 |
| *Chrysartona* sp. 1 | ZYGMO1222-15 | Male | Thailand | MK930876 |
| *Corma maculata* | ZYGMO647-13 | Male | Myanmar | MK930650 |
| *Corma maculata* | ZYGMO646-13 | Male | Myanmar | MK930651 |
| *Cyclosia panthona* | ZYGMO643-13 | Male | Thailand | MK930653 |
| *Cyclosia panthona* | ZYGMO642-13 | Male | Thailand | MK930654 |
| *Cyclosia panthona* | ZYGMO641-13 | Female | China | MK930655 |
| *Cyclosia panthona* | ZYGMO640-13 | Female | Myanmar | MK930652 |
| *Cyclosia papilionaris* | ZYGMO639-13 | Male | Thailand | MK930658 |
| *Cyclosia papilionaris* | ZYGMO638-13 | Female | Myanmar | MK930657 |
| *Cyclosia papilionaris* | ZYGMO637-13 | Female | Myanmar | MK930659 |
| *Cyclosia papilionaris* | ZYGMO635-13 | Female | Myanmar | MK930656 |
| *Cyclosia papilionaris* | ZYGMO636-13 | Female | Myanmar | MK930660 |
| *Dubernardia djreuma* | ZYGMO009-09 | Male | China | HM417797 |
| *Erasmia pulchella* | ZYGMO606-13 | Female | China | MK930662 |
| *Erasmia pulchella* | ZYGMO605-13 | Male | Myanmar | MK930663 |
| *Erasmia pulchella* | ZYGMO604-13 | Female | Myanmar | MK930661 |
| *Eterusia aedea* | ZYGMO614-13 | Female | China | MK930668 |
| *Eterusia aedea* | ZYGMO613-13 | Male | Myanmar | MK930664 |
| *Eterusia aedea* | ZYGMO608-13 | Female | China | MK930666 |
| *Eterusia aedea* | ZYGMO607-13 | Male | Myanmar | MK930665 |
| *Eterusia aedea* | ZYGMO609-13 | Male | Thailand | MK930667 |
| *Eterusia angustipennis* | ZYGMO610-13 | Female | Myanmar | MK930669 |
| *Eterusia* sp. 1 | ZYGMO611-13 | Female | China | MK930670 |
| *Eterusia tricolor* | ZYGMO612-13 | Female | Myanmar | MK930671 |
| *Eumorphiopais* sp. 1 | ZYGMO650-13 | Male | China | MK930672 |
| *Gynautocera papilionaria* | ZYGMO617-13 | Female | Myanmar | MK930675 |
| *Gynautocera papilionaria* | ZYGMO615-13 | Male | Myanmar | MK930674 |
| *Gynautocera papilionaria* | ZYGMO616-13 | Male | Myanmar | MK930673 |
| *Harrisina coracina* | ZYGMO533-12 | Male | Mexico | MK930676 |
| *Harrisina metallica* | ZYGMO851-13 | Male | USA | MK930682 |
| *Harrisina metallica* | ZYGMO850-13 | Male | USA | MK930681 |
| *Harrisina metallica* | ZYGMO849-13 | Male | USA | MK930680 |
| *Harrisina metallica* | ZYGMO847-13 | Male | USA | MK930678 |
| *Harrisina metallica* | ZYGMO334-10 | Male | USA | HQ987509 |
| *Harrisina metallica* | ZYGMO335-10 | Male | USA | HQ987510 |
| *Harrisina metallica* | ZYGMO848-13 | Male | USA | MK930679 |
| *Harrisina metallica* | ZYGMO846-13 | Female | USA | MK930677 |
| *Harrisinopsis robusta* | ZYGMO832-13 | Male | French Guiana | MK930683 |
| *Hedina elegans* | ZYGMO197-10 | Male | China | MK930684 |
| *Hedina louisi* | ZYGMO199-10 | Female | China | MK930686 |
| *Hedina psychina* | ZYGMO537-12 | Female | Japan | MK930689 |
| *Hedina psychina* | ZYGMO536-12 | Female | Japan | MK930687 |
| *Hedina psychina* | ZYGMO535-12 | Female | Japan | MK930688 |
| *Hedina translucida* | ZYGMO200-10 | Female | China | HQ584907 |
| *Hestiochora continentalis* | ZYGMO506-12 | Female | Australia | MK930690 |
| *Hestiochora continentalis* | ZYGMO424-10 | Male | Australia | HQ987565 |
| *Hestiochora tricolor* | ZYGMO440-10 | Male | Australia | HQ987580 |
| *Hestiochora tricolor* | ZYGMO426-10 | Male | Australia | HQ987567 |
| *Hestiochora tricolor* | ZYGMO425-10 | Male | Australia | HQ987566 |
| *Hestiochora xanthocoma* | ZYGMO507-12 | Male | Australia | MK930691 |
| *Histia flabellicornis* | ZYGMO620-13 | Male | Myanmar | MK930694 |
| *Histia flabellicornis* | ZYGMO618-13 | Female | Myanmar | MK930692 |
| *Histia flabellicornis* | ZYGMO619-13 | Male | Myanmar | MK930693 |
| *Homophylotis pseudothyridota* | ZYGMO1229-15 | Female | Australia | MK930696 |
| *Homophylotis pseudothyridota* | ZYGMO1227-15 | Female | Australia | MK930697 |
| *Homophylotis pseudothyridota* | ZYGMO1225-15 | Female | Australia | MK930695 |
| *Homophylotis pseudothyridota* | ZYGMO1224-15 | Male | Australia | MK930698 |
| *Homophylotis thyridota* | ZYGMO1228-15 | Female | Australia | MK930699 |
| *Homophylotis thyridota* | ZYGMO1226-15 | Male | Australia | MK930700 |
| *Hysteroscene extravagans* | ZYGMO1210-15 | Male | Taiwan | MK930701 |
| *Hysteroscene hyalina* | ZYGMO1209-15 | Male | Thailand | MK930704 |
| *Hysteroscene hyalina* | ZYGMO1208-15 | Male | Thailand | MK930703 |
| *Hysteroscene hyalina* | ZYGMO1207-15 | Male | Thailand | MK930702 |
| *Illiberis* *banmauka* | ZYGMO578-13 | Male | China | MK930716 |
| *Illiberis* *banmauka* | ZYGMO577-13 | Female | China | MK930719 |
| *Illiberis* *banmauka* | ZYGMO576-13 | Female | Myanmar | MK930714 |
| *Illiberis* *banmauka* | ZYGMO575-13 | Male | China | MK930715 |
| *Illiberis* *banmauka* | ZYGMO574-13 | Male | Myanmar | MK930713 |
| *Illiberis* *banmauka* | ZYGMO573-13 | Male | Myanmar | MK930718 |
| *Illiberis* *banmauka* | ZYGMO572-13 | Male | Myanmar | MK930717 |
| *Illiberis cernyi* | ZYGMO1219-15 | Male | Thailand | MK930706 |
| *Illiberis cernyi* | ZYGMO1218-15 | Male | Thailand | MK930707 |
| *Illiberis cernyi* | ZYGMO534-12 | Male | Thailand | MK930705 |
| *Illiberis ellenae* | ZYGMO008-09 | Female | China | GU705705 |
| *Illiberis ellenae* | ZYGMO006-09 | Male | China | GU705704 |
| *Illiberis habaensis* | ZYGMO287-10 | Male | China | MK930708 |
| *Illiberis kislovskyi* | ZYGMO579-13 | Male | Myanmar | MK930720 |
| *Illiberis ochracea* | ZYGMO196-10 | Female | China | HQ584906 |
| *Illiberis ochracea* | ZYGMO195-10 | Female | China | MK930709 |
| *Illiberis pruni* | ZYGMO563-12 | Male | Mongolia | MK930712 |
| *Illiberis pruni* | ZYGMO191-10 | Male | Russia | MK930710 |
| *Illiberis pruni* | ZYGMO192-10 | Female | Russia | MK930711 |
| *Illiberis rotundata* | ZYGMO004-09 | Male | Japan | HM417796 |
| *Illiberis ulmivora* | ZYGMO193-10 | Female | China | MK930721 |
| *Illiberis yuennanensis* | ZYGMO194-10 | Female | China | MK930722 |
| *Jordanita algirica* | ZYGMO318-10 | Male | Morocco | HQ987504 |
| *Jordanita algirica* | ZYGMO316-10 | Male | Morocco | HQ987502 |
| *Jordanita algirica* | ZYGMO317-10 | Male | Morocco | HQ987503 |
| *Jordanita almatiensis* | ZYGMO525-12 | Female | Kazakhstan | MK930724 |
| *Jordanita ambigua* | ZYGMO310-10 | Male | Kyrgyzstan | HQ987497 |
| *Jordanita ambigua* | ZYGMO386-10 | Female | Tajikistan | HQ987530 |
| *Jordanita ambigua* | ZYGMO385-10 | Male | Tajikistan | HQ987529 |
| *Jordanita ambigua* | ZYGMO384-10 | Male | Tajikistan | HQ987528 |
| *Jordanita ambigua* | ZYGMO383-10 | Male | Uzbekistan | HQ987527 |
| *Jordanita ambigua* | ZYGMO382-10 | Male | Uzbekistan | HQ987526 |
| *Jordanita ambigua* | ZYGMO315-10 | Male | Turkmenistan | HQ987501 |
| *Jordanita ambigua* | ZYGMO314-10 | Male | Turkmenistan | HQ987500 |
| *Jordanita ambigua* | ZYGMO210-10 | Male | Afghanistan | HQ584914 |
| *Jordanita anatolica* | ZYGMO568-12 | Male | Israel | MK930726 |
| *Jordanita anatolica* | ZYGMO138-09 | Male | Turkey | GU705749 |
| *Jordanita anatolica* | ZYGMO137-09 | Male | Turkey | GU705748 |
| *Jordanita anatolica* | ZYGMO135-09 | Male | Turkey | GU705750 |
| *Jordanita anatolica* | ZYGMO134-09 | Male | Turkey | GU705753 |
| *Jordanita anatolica* | ZYGMO136-09 | Male | Turkey | GU705751 |
| *Jordanita anatolica* | ZYGMO567-12 | Male | Iran | MK930729 |
| *Jordanita anatolica* | ZYGMO566-12 | Male | Iran | MK930727 |
| *Jordanita anatolica* | ZYGMO402-10 | Male | Iran | MK930728 |
| *Jordanita anatolica* | ZYGMO401-10 | Female | Iran | HQ987545 |
| *Jordanita benderi* | ZYGMO528-12 | Male | Morocco | MK930730 |
| *Jordanita budensis* | ZYGMO101-09 | Male | Crimea | HM386568 |
| *Jordanita budensis* | ZYGMO102-09 | Male | Crimea | GU705772 |
| *Jordanita budensis* | ZYGMO1022-14 | Male | France | MK930731 |
| *Jordanita budensis* | ZYGMO1023-14 | Male | Austria | MK930732 |
| *Jordanita budensis* | ZYGMO1024-14 | Male | Italy | MK930733 |
| *Jordanita budensis* | ZYGMO1025-14 | Male | Italy | MK930734 |
| *Jordanita budensis* | ZYGMO1026-14 | Male | Slovenia | MK930735 |
| *Jordanita budensis* | ZYGMO1027-14 | Female | Slovenia | MK930736 |
| *Jordanita budensis* | ZYGMO1028-14 | Male | Serbia | MK930737 |
| *Jordanita budensis* | ZYGMO1029-14 | Male | Macedonia | MK930738 |
| *Jordanita budensis* | ZYGMO1030-14 | Female | Macedonia | MK930739 |
| *Jordanita budensis* | ZYGMO103-09 | Male | Crimea | GU705769 |
| *Jordanita budensis* | ZYGMO281-10 | Male | Macedonia | HQ584973 |
| *Jordanita budensis* | ZYGMO282-10 | Male | Macedonia | HQ584974 |
| *Jordanita budensis* | ZYGMO283-10 | Male | Macedonia | HQ584975 |
| *Jordanita budensis* | ZYGMO453-10 | Male | Macedonia | HQ987593 |
| *Jordanita budensis* | ZYGMO564-12 | Male | Mongolia | MK930742 |
| *Jordanita budensis* | ZYGMO565-12 | Male | Mongolia | MK930743 |
| *Jordanita chloros* | ZYGMO220-10 | Male | Crimea | HQ584918 |
| *Jordanita chloros* | ZYGMO127-09 | Female | Crimea | HM386574 |
| *Jordanita chloros* | ZYGMO130-09 | Male | Turkey | HM386576 |
| *Jordanita chloros* | ZYGMO223-10 | Male | Crimea | HQ584919 |
| *Jordanita chloros* | ZYGMO222-10 | Male | Crimea | KX048068 |
| *Jordanita chloros* | ZYGMO128-09 | Female | Crimea | HM386575 |
| *Jordanita chloros* | ZYGMO224-10 | Male | Crimea | HQ584920 |
| *Jordanita chloros* | ZYGMO125-09 | Male | Crimea | GU705754 |
| *Jordanita cirtana* | ZYGMO313-10 | Female | Algeria | HQ987499 |
| *Jordanita cognata* | ZYGMO527-12 | Male | Tunisia | MK930744 |
| *Jordanita cognata* | ZYGMO321-10 | Male | Algeria | HQ987507 |
| *Jordanita globulariae* | ZYGMO133-09 | Male | Crimea | HM386577 |
| *Jordanita globulariae* | ZYGMO1187-15 | Female | Italy | MK930750 |
| *Jordanita globulariae* | ZYGMO1186-15 | Male | Italy | MK930749 |
| *Jordanita globulariae* | ZYGMO1142-14 | Male | Greece | MK930748 |
| *Jordanita globulariae* | ZYGMO1141-14 | Female | Greece | MK930747 |
| *Jordanita globulariae* | ZYGMO1140-14 | Male | Greece | MK930746 |
| *Jordanita globulariae* | ZYGMO1138-14 | Female | Greece | MK930745 |
| *Jordanita globulariae* | ZYGMO132-09 | Male | Crimea | GU705752 |
| *Jordanita globulariae* | ZYGMO131-09 | Male | Crimea | GU705755 |
| *Jordanita globulariae* | ZYGMO399-10 | Male | Macedonia | HQ987543 |
| *Jordanita globulariae* | ZYGMO396-10 | Male | Macedonia | HQ987540 |
| *Jordanita globulariae* | ZYGMO395-10 | Male | Macedonia | HQ987539 |
| *Jordanita globulariae* | ZYGMO455-10 | Male | Macedonia | HQ987595 |
| *Jordanita globulariae* | ZYGMO454-10 | Male | Macedonia | HQ987594 |
| *Jordanita graeca* | ZYGMO218-10 | Female | Armenia | MK930752 |
| *Jordanita graeca* | ZYGMO123-09 | Female | Crimea | GU705756 |
| *Jordanita graeca* | ZYGMO1133-14 | Male | Bulgaria | MK930755 |
| *Jordanita graeca* | ZYGMO214-10 | Male | Crimea | HQ584917 |
| *Jordanita graeca* | ZYGMO121-09 | Male | Crimea | HM386572 |
| *Jordanita graeca* | ZYGMO122-09 | Male | Crimea | HM386573 |
| *Jordanita graeca* | ZYGMO1134-14 | Male | Bulgaria | MK930754 |
| *Jordanita graeca* | ZYGMO212-10 | Female | Crimea | HQ584916 |
| *Jordanita graeca* | ZYGMO124-09 | Male | Turkey | GU705757 |
| *Jordanita graeca* | ZYGMO211-10 | Male | Crimea | HQ584915 |
| *Jordanita graeca* | ZYGMO217-10 | Male | Armenia | MK930751 |
| *Jordanita graeca* | ZYGMO213-10 | Male | Crimea | KX047699 |
| *Jordanita graeca* | ZYGMO219-10 | Female | Armenia | MK930753 |
| *Jordanita hector* | ZYGMO110-09 | Female | Turkey | GU705764 |
| *Jordanita hector* | ZYGMO109-09 | Male | Turkey | GU705763 |
| *Jordanita hispanica* | ZYGMO120-09 | Male | Spain | HM417803 |
| *Jordanita hispanica* | ZYGMO118-09 | Male | Spain | HM386570 |
| *Jordanita hispanica* | ZYGMO119-09 | Male | Spain | HM386571 |
| *Jordanita horni* | ZYGMO400-10 | Male | Iran | HQ987544 |
| *Jordanita horni* | ZYGMO153-09 | Male | Armenia | GU705734 |
| *Jordanita horni* | ZYGMO152-09 | Male | Armenia | GU705737 |
| *Jordanita horni* | ZYGMO151-09 | Male | Armenia | GU705736 |
| *Jordanita horni* | ZYGMO150-09 | Male | Armenia | GU705739 |
| *Jordanita horni* | ZYGMO149-09 | Male | Armenia | GU705738 |
| *Jordanita kurdica* | ZYGMO381-10 | Male | Iran | HQ987525 |
| *Jordanita maroccana* | ZYGMO529-12 | Male | Morocco | MK930756 |
| *Jordanita naufocki* | ZYGMO311-10 | Male | Kyrgyzstan | HQ987498 |
| *Jordanita notata* | ZYGMO1176-15 | Male | Italy | MK930757 |
| *Jordanita notata* | ZYGMO115-09 | Female | Spain | HM386569 |
| *Jordanita notata* | ZYGMO113-09 | Female | Crimea | GU705759 |
| *Jordanita notata* | ZYGMO112-09 | Female | Crimea | GU705762 |
| *Jordanita notata* | ZYGMO111-09 | Male | Crimea | GU705761 |
| *Jordanita paupera* | ZYGMO524-12 | Male | Iran | MK930766 |
| *Jordanita paupera* | ZYGMO1032-14 | Male | China | MK930759 |
| *Jordanita paupera* | ZYGMO305-10 | Male | China | HQ987494 |
| *Jordanita paupera* | ZYGMO1031-14 | Male | North Korea | MK930765 |
| *Jordanita paupera* | ZYGMO1037-14 | Male | Turkey | MK930762 |
| *Jordanita paupera* | ZYGMO304-10 | Male | Jordan | HQ987493 |
| *Jordanita paupera* | ZYGMO1034-14 | Male | Kazakhstan | MK930761 |
| *Jordanita paupera* | ZYGMO1033-14 | Male | Kazakhstan | MK930760 |
| *Jordanita paupera* | ZYGMO1036-14 | Male | Iran | MK930764 |
| *Jordanita paupera* | ZYGMO1035-14 | Male | Iran | MK930763 |
| *Jordanita rungsi* | ZYGMO320-10 | Male | Morocco | HQ987506 |
| *Jordanita rungsi* | ZYGMO319-10 | Male | Morocco | HQ987505 |
| *Jordanita splendens* | ZYGMO117-09 | Male | Kyrgyzstan | GU705758 |
| *Jordanita splendens* | ZYGMO116-09 | Female | Tajikistan | GU705760 |
| *Jordanita subsolana* | ZYGMO1123-14 | Female | Greece | MK930769 |
| *Jordanita subsolana* | ZYGMO1136-14 | Male | Bulgaria | MK930768 |
| *Jordanita subsolana* | ZYGMO139-09 | Female | Crimea | GU705746 |
| *Jordanita subsolana* | ZYGMO140-09 | Female | Armenia | GU705747 |
| *Jordanita subsolana* | ZYGMO141-09 | Female | Armenia | GU705744 |
| *Jordanita subsolana* | ZYGMO142-09 | Female | Armenia | GU705745 |
| *Jordanita subsolana* | ZYGMO143-09 | Male | Turkey | HM386578 |
| *Jordanita subsolana* | ZYGMO145-09 | Male | Turkey | GU705742 |
| *Jordanita subsolana* | ZYGMO146-09 | Male | Crimea | GU705743 |
| *Jordanita subsolana* | ZYGMO147-09 | Male | Crimea | GU705740 |
| *Jordanita subsolana* | ZYGMO148-09 | Female | Crimea | GU705741 |
| *Jordanita subsolana* | ZYGMO398-10 | Male | Macedonia | HQ987542 |
| *Jordanita subsolana* | ZYGMO542-12 | Male | Italy | KX048939 |
| *Jordanita subsolana* | ZYGMO543-12 | Male | Italy | KX049598 |
| *Jordanita subsolana* | ZYGMO569-12 | Male | Ukraine (Kharkov) | KX048986 |
| *Jordanita subsolana* | ZYGMO570-12 | Male | Ukraine (Kharkov) | KX050128 |
| *Jordanita syriaca* | ZYGMO530-12 | Male | Jordan | MK930770 |
| *Jordanita tenuicornis* | ZYGMO1175-15 | Male | Italy | MK930771 |
| *Jordanita tenuicornis* | ZYGMO1174-15 | Male | Italy | MK930772 |
| *Jordanita tenuicornis* | ZYGMO394-10 | Male | Italy | HQ987538 |
| *Jordanita tenuicornis* | ZYGMO393-10 | Male | Italy | HQ987537 |
| *Jordanita tenuicornis* | ZYGMO392-10 | Male | Italy | HQ987536 |
| *Jordanita tenuicornis* | ZYGMO390-10 | Male | Italy | HQ987534 |
| *Jordanita tenuicornis* | ZYGMO391-10 | Male | Italy | HQ987535 |
| *Jordanita tenuicornis* | ZYGMO389-10 | Female | Italy | HQ987533 |
| *Jordanita tenuicornis* | ZYGMO388-10 | Male | Italy | HQ987532 |
| *Jordanita tenuicornis* | ZYGMO387-10 | Male | Italy | HQ987531 |
| *Jordanita vartianae* | ZYGMO323-10 | Male | Spain | HQ987508 |
| *Jordanita volgensis* | ZYGMO1042-14 | Male | Russia (Omsk) | MK930775 |
| *Jordanita volgensis* | ZYGMO1041-14 | Male | Russia (Omsk) | MK930774 |
| *Jordanita volgensis* | ZYGMO456-10 | Male | Ukraine (Luhansk) | HQ987596 |
| *Jordanita volgensis* | ZYGMO108-09 | Male | Crimea | GU705766 |
| *Jordanita volgensis* | ZYGMO107-09 | Male | Crimea | GU705765 |
| *Jordanita volgensis* | ZYGMO106-09 | Male | Crimea | GU705768 |
| *Jordanita volgensis* | ZYGMO105-09 | Male | Crimea | GU705767 |
| *Jordanita volgensis* | ZYGMO104-09 | Male | Crimea | GU705770 |
| *Jordanita volgensis* | ZYGMO309-10 | Male | Turkey | MK930773 |
| *Jordanita volgensis* | ZYGMO308-10 | Male | Turkey | JN277135 |
| *Jordanita volgensis* | ZYGMO285-10 | Male | Turkey | HQ584977 |
| *Jordanita volgensis* | ZYGMO284-10 | Male | Turkey | HQ584976 |
| *Jordanita volgensis* | ZYGMO307-10 | Male | Syria | HQ987496 |
| *Jordanita volgensis* | ZYGMO306-10 | Male | Syria | HQ987495 |
| *Monalita faurei* | ZYGMO834-13 | Male | French Guiana | MK930776 |
| *Monalita faurei* | ZYGMO833-13 | Male | French Guiana | MK930777 |
| *Monalita laguerrei* | ZYGMO835-13 | Male | French Guiana | MK930778 |
| *Myrtartona coronias* | ZYGMO509-12 | Male | Australia | MK930780 |
| *Myrtartona leucopleura* | ZYGMO966-14 | Female | Australia | MK930781 |
| *Myrtartona rufiventris* | ZYGMO512-12 | Male | Australia | MK930783 |
| *Myrtartona rufiventris* | ZYGMO511-12 | Male | Australia | MK930784 |
| *Myrtartona rufiventris* | ZYGMO510-12 | Male | Australia | MK930782 |
| *Neoalbertia constans* | ZYGMO788-13 | Male | USA | MK930785 |
| *Neoalbertia constans* | ZYGMO786-13 | Male | USA | MK930786 |
| *Neoalbertia constans* | ZYGMO787-13 | Male | USA | MK930787 |
| *Neofelderia hoerwertneri* | ZYGMO784-13 | Male | Guatemala | MK930788 |
| *Neofelderia* n. sp. 1 | ZYGMO783-13 | Female | Mexico | MK930790 |
| *Neofelderia rata* | ZYGMO780-13 | Male | USA | MK930793 |
| *Neofelderia rata* | ZYGMO778-13 | Male | USA | MK930791 |
| *Neofelderia rata* | ZYGMO779-13 | Male | USA | MK930792 |
| *Neofelderia* sp. 1 | ZYGMO760-13 | Male | Mexico | MK930794 |
| *Neoilliberis fusca* | ZYGMO772-13 | Male | USA | MK930797 |
| *Neoilliberis fusca* | ZYGMO771-13 | Male | USA | MK930796 |
| *Neoilliberis fusca* | ZYGMO770-13 | Male | USA | MK930795 |
| *Neoilliberis ignorata* | ZYGMO759-13 | Female | Mexico | MK930798 |
| *Neoilliberis mas* | ZYGMO775-13 | Female | Mexico | MK930800 |
| *Neoilliberis mas* | ZYGMO774-13 | Male | Mexico | MK930799 |
| *Neoilliberis* n. sp. 1 | ZYGMO773-13 | Male | Mexico | MK930801 |
| *Neoilliberis* sp. 2 | ZYGMO532-12 | Female | Mexico | MK930803 |
| *Neoilliberis* sp. 2 | ZYGMO531-12 | Male | Mexico | MK930804 |
| *Neoilliberis* sp. 4 | ZYGMO757-13 | Female | Mexico | MK930806 |
| *Neoprocris aversa* | ZYGMO791-13 | Male | USA | MK930808 |
| *Neoprocris aversa* | ZYGMO790-13 | Male | USA | MK930809 |
| *Neoprocris aversa* | ZYGMO789-13 | Male | USA | MK930810 |
| *Neoprocris floridana* | ZYGMO792-13 | Female | USA | MK930811 |
| *Onceropyga anelia* | ZYGMO1232-15 | Female | Australia | MK930813 |
| *Onceropyga anelia* | ZYGMO439-10 | Male | Australia | HQ987579 |
| *Onceropyga anelia* | ZYGMO438-10 | Female | Australia | HQ987578 |
| *Onceropyga anelia* | ZYGMO427-10 | Female | Australia | MK930812 |
| *Pampa* n. sp. 1 | ZYGMO814-13 | Female | Costa Rica | MK930816 |
| *Pampa* n. sp. 1 | ZYGMO813-13 | Male | Costa Rica | MK930814 |
| *Pampa hermieri* | ZYGMO819-13 | Female | French Guiana | MK930817 |
| *Pampa* sp. | ZYGMO843-13 | Female | French Guiana | MK930818 |
| *Phacusa* sp. | ZYGMO590-13 | Female | Myanmar | MK930822 |
| *Phacusa* sp. | ZYGMO589-13 | Female | Myanmar | MK930820 |
| *Phacusa* sp. | ZYGMO588-13 | Male | Myanmar | MK930821 |
| *Phacusa* sp. 1 | ZYGMO1217-15 | Male | Laos | MK930824 |
| *Phacusa* sp. 1 | ZYGMO1216-15 | Male | Laos | MK930823 |
| *Phacusa* sp. 1 | ZYGMO1215-15 | Male | Laos | MK930825 |
| *Phacusa tenebrosa* | ZYGMO1214-15 | Male | Laos | MK930828 |
| *Phacusa tenebrosa* | ZYGMO1213-15 | Male | Laos | MK930826 |
| *Phacusa tenebrosa* | ZYGMO1212-15 | Male | Laos | MK930827 |
| *Philopator basimaculata* | ZYGMO649-13 | Female | Myanmar | MK930829 |
| *Philopator basimaculata* | ZYGMO648-13 | Male | Myanmar | MK930830 |
| *Pidorus albifascia* | ZYGMO623-13 | Female | Myanmar | MK930833 |
| *Pidorus albifascia* | ZYGMO622-13 | Female | Myanmar | MK930832 |
| *Pidorus albifascia* | ZYGMO621-13 | Female | Myanmar | MK930831 |
| *Pidorus circe* | ZYGMO624-13 | Female | China | MK930834 |
| *Pidorus glaucopis* | ZYGMO627-13 | Female | Myanmar | MK930835 |
| *Pidorus glaucopis* | ZYGMO626-13 | Male | Myanmar | MK930836 |
| *Pidorus glaucopis* | ZYGMO625-13 | Male | Myanmar | MK930837 |
| *Pollanisus acharon* | ZYGMO413-10 | Female | Australia | HQ987556 |
| *Pollanisus acharon* | ZYGMO412-10 | Female | Australia | HQ987555 |
| *Pollanisus acharon* | ZYGMO409-10 | Female | Australia | HQ987552 |
| *Pollanisus acharon* | ZYGMO433-10 | Female | Australia | HQ987573 |
| *Pollanisus acharon* | ZYGMO411-10 | Female | Australia | HQ987554 |
| *Pollanisus acharon* | ZYGMO410-10 | Male | Australia | HQ987553 |
| *Pollanisus acharon* | ZYGMO408-10 | Female | Australia | HQ987551 |
| *Pollanisus apicalis* | ZYGMO755-13 | Male | Australia | MK930840 |
| *Pollanisus apicalis* | ZYGMO488-12 | Female | Australia | MK930839 |
| *Pollanisus apicalis* | ZYGMO487-12 | Male | Australia | MK930838 |
| *Pollanisus calliceros* | ZYGMO500-12 | Male | Australia | MK930841 |
| *Pollanisus commoni* | ZYGMO404-10 | Female | Australia | HQ987547 |
| *Pollanisus commoni* | ZYGMO405-10 | Male | Australia | HQ987548 |
| *Pollanisus commoni* | ZYGMO406-10 | Female | Australia | HQ987549 |
| *Pollanisus commoni* | ZYGMO403-10 | Female | Australia | HQ987546 |
| *Pollanisus commoni* | ZYGMO428-10 | Male | Australia | HQ987568 |
| *Pollanisus commoni* | ZYGMO429-10 | Female | Australia | HQ987569 |
| *Pollanisus contrastus* | ZYGMO495-12 | Male | Australia | MK930844 |
| *Pollanisus contrastus* | ZYGMO496-12 | Female | Australia | MK930845 |
| *Pollanisus contrastus* | ZYGMO494-12 | Female | Australia | MK930843 |
| *Pollanisus contrastus* | ZYGMO492-12 | Female | Australia | MK930846 |
| *Pollanisus contrastus* | ZYGMO493-12 | Female | Australia | MK930842 |
| *Pollanisus cupreus* | ZYGMO478-12 | Male | Australia | MK930849 |
| *Pollanisus cupreus* | ZYGMO479-12 | Male | Australia | MK930850 |
| *Pollanisus cupreus* | ZYGMO477-12 | Male | Australia | MK930848 |
| *Pollanisus cupreus* | ZYGMO476-12 | Male | Australia | MK930847 |
| *Pollanisus cyanota* | ZYGMO1234-15 | Female | Australia | MK930852 |
| *Pollanisus cyanota* | ZYGMO1233-15 | Male | Australia | MK930851 |
| *Pollanisus edwardsi* | ZYGMO491-12 | Male | Australia | MK930854 |
| *Pollanisus edwardsi* | ZYGMO490-12 | Male | Australia | MK930853 |
| *Pollanisus empyrea* | ZYGMO486-12 | Male | Australia | MK930857 |
| *Pollanisus empyrea* | ZYGMO485-12 | Male | Australia | MK930855 |
| *Pollanisus* *empyrea* | ZYGMO501-12 | Male | Australia | MK930856 |
| *Pollanisus eumetopus* | ZYGMO407-10 | Male | Australia | HQ987550 |
| *Pollanisus eumetopus* | ZYGMO430-10 | Female | Australia | HQ987570 |
| *Pollanisus eumetopus* | ZYGMO431-10 | Male | Australia | HQ987571 |
| *Pollanisus eumetopus* | ZYGMO432-10 | Female | Australia | HQ987572 |
| *Pollanisus eungellae* | ZYGMO497-12 | Male | Australia | MK930858 |
| *Pollanisus incertus* | ZYGMO1238-15 | Male | Australia | MK930860 |
| *Pollanisus incertus* | ZYGMO1237-15 | Male | Australia | MK930859 |
| *Pollanisus lithopastus* | ZYGMO484-12 | Male | Australia | MK930862 |
| *Pollanisus lithopastus* | ZYGMO482-12 | Male | Australia | MK930864 |
| *Pollanisus lithopastus* | ZYGMO419-10 | Male | Australia | HQ987562 |
| *Pollanisus marriotti* | ZYGMO499-12 | Male | Australia | MK930865 |
| *Pollanisus nielseni* | ZYGMO481-12 | Female | Australia | MK930866 |
| *Pollanisus nielseni* | ZYGMO480-12 | Female | Australia | MK930867 |
| *Pollanisus* sp. 5 | ZYGMO502-12 | Female | Australia | MK930868 |
| *Pollanisus* sp. 5 | ZYGMO434-10 |  | Australia | HQ987574 |
| *Pollanisus* sp. 6 | ZYGMO503-12 | Male | Australia | MK930869 |
| *Pollanisus* sp. 6 | ZYGMO416-10 | Male | Australia | HQ987559 |
| *Pollanisus* sp. 6 | ZYGMO418-10 | Male | Australia | HQ987561 |
| *Pollanisus* sp. 6 | ZYGMO417-10 | Male | Australia | HQ987560 |
| *Pollanisus* sp. 7 | ZYGMO414-10 | Male | Australia | HQ987557 |
| *Pollanisus* sp. 7 | ZYGMO504-12 | Female | Australia | MK930872 |
| *Pollanisus* sp. 7 | ZYGMO415-10 | Male | Australia | HQ987558 |
| *Pollanisus* sp. 8 | ZYGMO505-12 | Male | Australia | MK930870 |
| *Pollanisus* sp. 9 | ZYGMO754-13 | Female | Australia | MK930871 |
| *Pollanisus subdolosa* | ZYGMO420-10 | Male | Australia | HQ987563 |
| *Pollanisus subdolosa* | ZYGMO423-10 | Male | Australia | HQ987564 |
| *Pollanisus subdolosa* | ZYGMO422-10 | Male | Australia | MK930874 |
| *Pollanisus subdolosa* | ZYGMO421-10 | Male | Australia | MK930873 |
| *Pollanisus trimacula* | ZYGMO489-12 | Male | Australia | MK930875 |
| *Pollanisus viridipulverulenta* | ZYGMO437-10 | Female | Australia | HQ987577 |
| *Pollanisus viridipulverulenta* | ZYGMO436-10 | Male | Australia | HQ987576 |
| *Pollanisus viridipulverulenta* | ZYGMO435-10 | Male | Australia | HQ987575 |
| *Procridinae* sp. | ZYGMO747-13 | Male | Africa | MK930878 |
| *Pseudophacusa multidentata* | ZYGMO1221-15 | Female | China | MK930885 |
| *Pseudophacusa multidentata* | ZYGMO591-13 | Male | Myanmar | MK930880 |
| *Pseudophacusa multidentata* | ZYGMO1220-15 | Male | Myanmar | MK930879 |
| *Pseudophacusa multidentata* | ZYGMO594-13 | Male | Myanmar | MK930883 |
| *Pseudophacusa multidentata* | ZYGMO593-13 | Male | Myanmar | MK930882 |
| *Pseudophacusa multidentata* | ZYGMO592-13 | Female | Myanmar | MK930881 |
| *Psaphis euschemoides* | ZYGMO630-13 | Female | China | MK930887 |
| *Psaphis euschemoides* | ZYGMO629-13 | Female | China | MK930886 |
| *Psaphis euschemoides* | ZYGMO628-13 | Female | Myanmar | MK930888 |
| *Pseudoamuria neglecta* | ZYGMO967-14 | Female | Australia | MK930889 |
| *Pseudoprocris dolosa* | ZYGMO794-13 | Female | Guatemala | MK930891 |
| *Pseudoprocris dolosa* | ZYGMO793-13 | Male | Guatemala | MK930892 |
| *Pseudoprocris gracilis* | ZYGMO795-13 | Male | Guatemala | MK930893 |
| *Pycnoctena angustula* | ZYGMO838-13 | Female | French Guiana | MK930896 |
| *Pycnoctena angustula* | ZYGMO837-13 | Female | French Guiana | MK930895 |
| *Pyromorpha brueckneri* | ZYGMO803-13 | Male | Guatemala | MK930898 |
| *Pyromorpha brueckneriana* | ZYGMO806-13 | Male | Mexico | MK930900 |
| *Pyromorpha brueckneriana* | ZYGMO805-13 | Male | Mexico | MK930901 |
| *Pyromorpha cuchumatana* | ZYGMO808-13 | Male | Guatemala | MK930904 |
| *Pyromorpha cuchumatana* | ZYGMO807-13 | Male | Guatemala | MK930905 |
| *Pyromorpha dyari* | ZYGMO802-13 | Male | USA | MK930907 |
| *Pyromorpha dyari* | ZYGMO801-13 | Male | USA | MK930908 |
| *Pyromorpha dyari* | ZYGMO800-13 | Male | USA | MK930906 |
| *Rhagades amasina* | ZYGMO018-09 | Female | Turkey | GU705699 |
| *Rhagades amasina* | ZYGMO016-09 | Male | Turkey | GU705702 |
| *Rhagades brandti* | ZYGMO230-10 | Male | Iran | HQ584924 |
| *Rhagades brandti* | ZYGMO229-10 | Male | Iran | HQ584923 |
| *Rhagades brandti* | ZYGMO013-09 | Female | Iran | HM417798 |
| *Rhagades predotae* | ZYGMO290-10 | Male | Spain | HQ987489 |
| *Rhagades pruni* | ZYGMO233-10 | Female | Germany | HQ584926 |
| *Rhagades pruni* | ZYGMO232-10 | Male | Germany | HQ584925 |
| *Rhagades pruni* | ZYGMO231-10 | Male | Denmark | KX050087 |
| *Rhagades pruni* | ZYGMO023-09 | Male | Crimea | GU705697 |
| *Rhagades pruni* | ZYGMO024-09 | Male | Crimea | GU705698 |
| *Rhagades pruni* | ZYGMO025-09 | Male | Crimea | GU705695 |
| *Rhagades pruni* | ZYGMO026-09 | Male | Crimea | GU705696 |
| *Rhagades pruni* | ZYGMO022-09 | Male | Crimea | GU705700 |
| *Rhagades pruni* | ZYGMO293-10 | Female | Japan | MK930912 |
| *Rhagades pruni* | ZYGMO292-10 | Male | Japan | MK930911 |
| *Saliunca meruana* | ZYGMO715-13 | Male | Tanzania | MK930915 |
| *Saliunca orphnina* | ZYGMO714-13 | Female | Rwanda | MK930918 |
| *Saliunca orphnina* | ZYGMO701-13 | Male | Rwanda | MK930917 |
| *Saliunca styx* | ZYGMO960-14 | Female | Democratic Republic of the Congo | MK930922 |
| *Saliunca styx* | ZYGMO959-14 | Female | Kenya | MK930921 |
| *Saliunca styx* | ZYGMO958-14 | Male | Kenya | MK930923 |
| *Saliunca styx* | ZYGMO703-13 | Male | Cameroon | MK930920 |
| *Saliunca styx* | ZYGMO702-13 | Male | Cameroon | MK930924 |
| *Soritia pulchella* | ZYGMO634-13 | Female | Myanmar | MK930927 |
| *Soritia pulchella* | ZYGMO633-13 | Male | Myanmar | MK930929 |
| *Soritia pulchella* | ZYGMO631-13 | Male | Myanmar | MK930930 |
| *Soritia pulchella* | ZYGMO632-13 | Male | Myanmar | MK930928 |
| *Sthenoprocris brondeli* | ZYGMO737-13 | Female | Madagascar | MK930931 |
| *Stylura brasiliensis* | ZYGMO829-13 | Female | Paraguay | MK930932 |
| *Stylura cirama* | ZYGMO845-13 | Male | Costa Rica | MK930933 |
| *Stylura forficula* | ZYGMO828-13 | Female | Brazil | MK930934 |
| *Syringura triplex* | ZYGMO698-13 | Male | Cameroon | MK930935 |
| *Tascia finalis* | ZYGMO709-13 | Female | Zimbabwe | MK930936 |
| *Theresimima ampellophaga* | ZYGMO011-09 | Female | Crimea | GU705701 |
| *Theresimima ampellophaga* | ZYGMO010-09 | Female | Crimea | GU705703 |
| *Triprocris cyanea* | ZYGMO811-13 | Male | USA | MK930937 |
| *Triprocris cyanea* | ZYGMO812-13 | Female | USA | MK930938 |
| *Triprocris cyanea* | ZYGMO810-13 | Male | USA | MK930939 |
| *Triprocris cyanea* | ZYGMO809-13 | Male | USA | MK930940 |
| *Turneriprocris dolens* | ZYGMO508-12 | Male | Australia | MK930941 |
| *Zama endocyanea* | ZYGMO1206-15 | Male | Bhutan | MK930942 |
| *Zama endocyanea* | ZYGMO1205-15 | Male | Bhutan | MK930943 |
| *Zama nigrigemma* | ZYGMO1043-14 | Male | Myanmar | MK930952 |
| *Zama nigrigemma* | ZYGMO1044-14 | Female | Myanmar | MK930944 |
| *Zama nigrigemma* | ZYGMO1045-14 | Male | China | MK930945 |
| *Zama nigrigemma* | ZYGMO1046-14 | Male | Laos | MK930946 |
| *Zama nigrigemma* | ZYGMO1047-14 | Female | Laos | MK930949 |
| *Zama nigrigemma* | ZYGMO580-13 | Male | Myanmar | MK930948 |
| *Zama nigrigemma* | ZYGMO581-13 | Female | Myanmar | MK930951 |
| *Zama nigrigemma* | ZYGMO582-13 | Female | Myanmar | MK930947 |
| *Zama* sp. | ZYGMO587-13 | Male | China | MK930950 |
| *Zama* sp. | ZYGMO586-13 | Male | Myanmar | MK930954 |
| *Zama* sp. | ZYGMO585-13 | Male | Myanmar | MK930956 |
| *Zama* sp. | ZYGMO584-13 | Female | Myanmar | MK930953 |
| *Zama* sp. | ZYGMO583-13 | Male | Myanmar | MK930955 |
| *Zygaena afghana* | ZYGMO463-10 | Female | Afghanistan | HQ987602 |
| *Zygaena angelicae* | ZYGMO1084-14 | Male | Greece | MK930958 |
| *Zygaena angelicae* | ZYGMO1082-14 | Male | Greece | MK930960 |
| *Zygaena angelicae* | ZYGMO1083-14 | Male | Greece | MK930959 |
| *Zygaena angelicae* | ZYGMO1054-14 | Female | Macedonia | MK930961 |
| *Zygaena angelicae* | ZYGMO1053-14 | Female | Macedonia | MK930957 |
| *Zygaena brizae* | ZYGMO163-09 | Male | Crimea | GU705728 |
| *Zygaena brizae* | ZYGMO162-09 | Male | Crimea | GU705731 |
| *Zygaena cambysea* | ZYGMO924-14 | Male | Iran | MK930965 |
| *Zygaena cambysea* | ZYGMO923-14 | Male | Iran | MK930964 |
| *Zygaena cambysea* | ZYGMO922-14 | Male | Iran | MK930963 |
| *Zygaena cambysea* | ZYGMO369-10 | Female | Armenia | HQ987519 |
| *Zygaena carniolica* | ZYGMO1106-14 | Female | Greece | MK930972 |
| *Zygaena carniolica* | ZYGMO1107-14 | Male | Greece | MK930973 |
| *Zygaena carniolica* | ZYGMO1112-14 | Male | Greece | MK930966 |
| *Zygaena carniolica* | ZYGMO1113-14 | Male | Greece | MK930967 |
| *Zygaena carniolica* | ZYGMO1114-14 | Male | Greece | MK930968 |
| *Zygaena carniolica* | ZYGMO1158-15 | Female | Italy | MK930971 |
| *Zygaena carniolica* | ZYGMO1159-15 | Male | Italy | MK930970 |
| *Zygaena carniolica* | ZYGMO1160-15 | Female | Italy | MK930969 |
| *Zygaena carniolica* | ZYGMO171-09 | Female | Crimea | GU705721 |
| *Zygaena carniolica* | ZYGMO172-09 | Male | Crimea | GU705722 |
| *Zygaena carniolica* | ZYGMO464-10 | Male | Turkey | HQ987603 |
| *Zygaena chirazica* | ZYGMO380-10 | Male | Iran | HQ987524 |
| *Zygaena cocandica* | ZYGMO373-10 | Female | Kyrgyzstan | HQ987521 |
| *Zygaena cocandica* | ZYGMO372-10 | Male | Kyrgyzstan | HQ987520 |
| *Zygaena cuvieri* | ZYGMO459-10 | Female | Armenia | HQ987598 |
| *Zygaena cuvieri* | ZYGMO458-10 | Male | Armenia | HQ987597 |
| *Zygaena cynarae* | ZYGMO1165-15 | Male | Italy | MK930975 |
| *Zygaena cynarae* | ZYGMO1164-15 | Male | Italy | MK930974 |
| *Zygaena ephialtes* | ZYGMO185-09 | Male | Crimea | GU705712 |
| *Zygaena ephialtes* | ZYGMO183-09 | Male | Crimea | GU705714 |
| *Zygaena ephialtes* | ZYGMO184-09 | Female | Crimea | GU705711 |
| *Zygaena erythrus* | ZYGMO930-14 | Male | Italy | MK930980 |
| *Zygaena erythrus* | ZYGMO928-14 | Male | Italy | MK930979 |
| *Zygaena erythrus* | ZYGMO929-14 | Male | Italy | MK930978 |
| *Zygaena escalerai* | ZYGMO376-10 | Male | Iran | HQ987522 |
| *Zygaena filipendulae* | ZYGMO1170-15 | Male | Italy | MK931019 |
| *Zygaena filipendulae* | ZYGMO1169-15 | Male | Italy | MK931018 |
| *Zygaena filipendulae* | ZYGMO1167-15 | Female | Italy | MK931016 |
| *Zygaena filipendulae* | ZYGMO1166-15 | Female | Italy | MK931015 |
| *Zygaena filipendulae* | ZYGMO1168-15 | Male | Italy | MK931017 |
| *Zygaena filipendulae* | ZYGMO1155-15 | Male | Italy | MK931007 |
| *Zygaena filipendulae* | ZYGMO1154-15 | Male | Italy | MK931002 |
| *Zygaena filipendulae* | ZYGMO1156-15 | Male | Italy | MK931008 |
| *Zygaena filipendulae* | ZYGMO1157-15 | Female | Italy | MK931011 |
| *Zygaena filipendulae* | ZYGMO1153-15 | Male | Italy | MK931001 |
| *Zygaena filipendulae* | ZYGMO1152-15 | Male | Italy | MK931000 |
| *Zygaena filipendulae* | ZYGMO1151-15 | Male | Italy | MK930999 |
| *Zygaena filipendulae* | ZYGMO1116-14 | Male | Greece | MK931010 |
| *Zygaena filipendulae* | ZYGMO1060-14 | Female | Albania | MK930983 |
| *Zygaena filipendulae* | ZYGMO1100-14 | Male | Greece | MK930998 |
| *Zygaena filipendulae* | ZYGMO1096-14 | Female | Bulgaria | MK930981 |
| *Zygaena filipendulae* | ZYGMO1055-14 | Male | Greece | MK930987 |
| *Zygaena filipendulae* | ZYGMO1108-14 | Female | Greece | MK931006 |
| *Zygaena filipendulae* | ZYGMO1095-14 | Female | Bulgaria | MK930995 |
| *Zygaena filipendulae* | ZYGMO1079-14 | Male | Greece | MK931012 |
| *Zygaena filipendulae* | ZYGMO1061-14 | Male | Albania | MK930988 |
| *Zygaena filipendulae* | ZYGMO1057-14 | Male | Greece | MK930985 |
| *Zygaena filipendulae* | ZYGMO1056-14 | Male | Greece | MK930986 |
| *Zygaena filipendulae* | ZYGMO1104-14 | Male | Greece | MK931004 |
| *Zygaena filipendulae* | ZYGMO1103-14 | Male | Greece | MK931003 |
| *Zygaena filipendulae* | ZYGMO1097-14 | Male | Bulgaria | MK930996 |
| *Zygaena filipendulae* | ZYGMO1059-14 | Male | Albania | MK930982 |
| *Zygaena filipendulae* | ZYGMO1099-14 | Female | Greece | MK930997 |
| *Zygaena filipendulae* | ZYGMO1115-14 | Male | Greece | MK931009 |
| *Zygaena filipendulae* | ZYGMO1072-14 | Male | Greece | MK930993 |
| *Zygaena filipendulae* | ZYGMO1067-14 | Female | Greece | MK930991 |
| *Zygaena filipendulae* | ZYGMO1066-14 | Female | Greece | MK930990 |
| *Zygaena filipendulae* | ZYGMO1065-14 | Male | Greece | MK930989 |
| *Zygaena filipendulae* | ZYGMO1071-14 | Male | Greece | MK930992 |
| *Zygaena filipendulae* | ZYGMO1105-14 | Male | Greece | MK931005 |
| *Zygaena filipendulae* | ZYGMO1058-14 | Male | Albania | MK930984 |
| *Zygaena filipendulae* | ZYGMO473-10 | Male | Ukraine (Kharkov) | MK930994 |
| *Zygaena filipendulae* | ZYGMO187-09 | Female | Crimea | GU705710 |
| *Zygaena filipendulae* | ZYGMO186-09 | Female | Crimea | GU705709 |
| *Zygaena filipendulae* | ZYGMO1081-14 | Male | Greece | MK931014 |
| *Zygaena filipendulae* | ZYGMO1080-14 | Male | Greece | MK931013 |
| *Zygaena formosa* | ZYGMO460-10 | Male | Turkey | HQ987599 |
| *Zygaena haematina* | ZYGMO364-10 | Female | Iran | HQ987517 |
| *Zygaena haematina* | ZYGMO363-10 | Male | Iran | HQ987516 |
| *Zygaena haematina* | ZYGMO362-10 | Female | Iran | HQ987515 |
| *Zygaena haematina* | ZYGMO361-10 | Male | Iran | HQ987514 |
| *Zygaena haematina* | ZYGMO365-10 | Male | Iran | HQ987518 |
| *Zygaena laeta* | ZYGMO161-09 | Male | Crimea | GU705730 |
| *Zygaena laeta* | ZYGMO159-09 | Female | Crimea | GU705775 |
| *Zygaena laeta* | ZYGMO160-09 | Female | Crimea | GU705733 |
| *Zygaena lonicerae* | ZYGMO1147-15 | Male | Italy | MK931020 |
| *Zygaena lonicerae* | ZYGMO1146-15 | Male | Italy | MK931021 |
| *Zygaena lonicerae* | ZYGMO190-09 | Female | Crimea | GU705706 |
| *Zygaena lonicerae* | ZYGMO189-09 | Female | Crimea | GU705708 |
| *Zygaena lonicerae* | ZYGMO188-09 | Male | Crimea | GU705707 |
| *Zygaena loti* | ZYGMO1163-15 | Male | Italy | MK931025 |
| *Zygaena loti* | ZYGMO1162-15 | Male | Italy | MK931026 |
| *Zygaena loti* | ZYGMO1161-15 | Male | Italy | MK931027 |
| *Zygaena loti* | ZYGMO1094-14 | Female | Bulgaria | MK931029 |
| *Zygaena loti* | ZYGMO1049-14 | Male | Macedonia | MK931033 |
| *Zygaena loti* | ZYGMO1078-14 | Female | Greece | MK931023 |
| *Zygaena loti* | ZYGMO1077-14 | Male | Greece | MK931024 |
| *Zygaena loti* | ZYGMO1075-14 | Female | Greece | MK931030 |
| *Zygaena loti* | ZYGMO1074-14 | Male | Greece | MK931031 |
| *Zygaena loti* | ZYGMO1073-14 | Male | Greece | MK931032 |
| *Zygaena loti* | ZYGMO1050-14 | Male | Macedonia | MK931022 |
| *Zygaena loti* | ZYGMO180-09 | Female | Crimea | GU705713 |
| *Zygaena loti* | ZYGMO178-09 | Male | Crimea | GU705715 |
| *Zygaena loti* | ZYGMO177-09 | Male | Crimea | GU705718 |
| *Zygaena loti* | ZYGMO179-09 | Male | Crimea | GU705716 |
| *Zygaena loti* | ZYGMO1076-14 | Male | Greece | MK931028 |
| *Zygaena minos* | ZYGMO164-09 | Male | Crimea | GU705729 |
| *Zygaena minos* | ZYGMO165-09 | Male | Crimea | GU705726 |
| *Zygaena minos* | ZYGMO868-14 | Male | Austria | MK931035 |
| *Zygaena minos* | ZYGMO875-14 | Male | Greece | MK931055 |
| *Zygaena minos* | ZYGMO880-14 | Male | Austria | MK931054 |
| *Zygaena minos* | ZYGMO885-14 | Female | Austria | MK931049 |
| *Zygaena minos* | ZYGMO887-14 | Male | Turkey | MK931047 |
| *Zygaena minos* | ZYGMO889-14 | Female | Turkey | MK931045 |
| *Zygaena minos* | ZYGMO890-14 | Female | Turkey | MK931044 |
| *Zygaena minos* | ZYGMO891-14 | Male | Turkey | MK931043 |
| *Zygaena minos* | ZYGMO903-14 | Male | Italy | MK931042 |
| *Zygaena minos* | ZYGMO908-14 | Female | Iran | MK931041 |
| *Zygaena minos* | ZYGMO910-14 | Male | Turkey | MK931040 |
| *Zygaena minos* | ZYGMO918-14 | Male | Albania | MK931056 |
| *Zygaena minos* | ZYGMO921-14 | Female | Turkey | MK931057 |
| *Zygaena minos* | ZYGMO940-14 | Male | Iran | MK931050 |
| *Zygaena minos* | ZYGMO945-14 | Male | Macedonia | MK931034 |
| *Zygaena minos* | ZYGMO946-14 | Male | Macedonia | MK931048 |
| *Zygaena minos* | ZYGMO949-14 | Female | Macedonia | MK931036 |
| *Zygaena naumanni* | ZYGMO378-10 | Female | Iran | HQ987523 |
| *Zygaena nevadensis* | ZYGMO1145-15 | Male | Italy | MK931059 |
| *Zygaena nevadensis* | ZYGMO1048-14 | Male | Italy | MK931058 |
| *Zygaena nevadensis* | ZYGMO1144-15 | Male | Italy | MK931060 |
| *Zygaena nevadensis* | ZYGMO1102-14 | Female | Greece | MK931062 |
| *Zygaena olivieri* | ZYGMO462-10 | Female | Armenia | HQ987601 |
| *Zygaena olivieri* | ZYGMO461-10 | Male | Armenia | HQ987600 |
| *Zygaena osterodensis* | ZYGMO471-10 | Male | Turkey | HQ987605 |
| *Zygaena punctum* | ZYGMO1070-14 | Male | Greece | MK931064 |
| *Zygaena punctum* | ZYGMO1069-14 | Male | Greece | MK931065 |
| *Zygaena punctum* | ZYGMO1062-14 | Male | Albania | MK931068 |
| *Zygaena punctum* | ZYGMO1063-14 | Female | Albania | MK931067 |
| *Zygaena punctum* | ZYGMO1068-14 | Female | Greece | MK931063 |
| *Zygaena punctum* | ZYGMO1064-14 | Female | Greece | MK931066 |
| *Zygaena punctum* | ZYGMO158-09 | Male | Crimea | GU705732 |
| *Zygaena punctum* | ZYGMO157-09 | Male | Crimea | GU705735 |
| *Zygaena purpuralis* | ZYGMO1085-14 | Male | Greece | MK931114 |
| *Zygaena purpuralis* | ZYGMO1086-14 | Male | Greece | MK931113 |
| *Zygaena purpuralis* | ZYGMO1087-14 | Male | Greece | MK931134 |
| *Zygaena purpuralis* | ZYGMO1088-14 | Male | Bulgaria | MK931133 |
| *Zygaena purpuralis* | ZYGMO1089-14 | Male | Bulgaria | MK931084 |
| *Zygaena purpuralis* | ZYGMO1090-14 | Female | Bulgaria | MK931085 |
| *Zygaena purpuralis* | ZYGMO1091-14 | Male | Bulgaria | MK931086 |
| *Zygaena purpuralis* | ZYGMO1092-14 | Male | Bulgaria | MK931087 |
| *Zygaena purpuralis* | ZYGMO1093-14 | Male | Bulgaria | MK931088 |
| *Zygaena purpuralis* | ZYGMO1098-14 | Female | Greece | MK931089 |
| *Zygaena purpuralis* | ZYGMO1101-14 | Female | Greece | MK931090 |
| *Zygaena purpuralis* | ZYGMO1109-14 | Male | Greece | MK931102 |
| *Zygaena purpuralis* | ZYGMO1110-14 | Male | Greece | MK931106 |
| *Zygaena purpuralis* | ZYGMO1111-14 | Male | Greece | MK931108 |
| *Zygaena purpuralis* | ZYGMO166-09 | Male | Crimea | GU705727 |
| *Zygaena purpuralis* | ZYGMO167-09 | Male | Crimea | HM417804 |
| *Zygaena purpuralis* | ZYGMO856-14 | Male | Bosnia and Herzegovina | MK931115 |
| *Zygaena purpuralis* | ZYGMO857-14 | Male | Germany | MK931116 |
| *Zygaena purpuralis* | ZYGMO858-14 | Male | Austria | MK931117 |
| *Zygaena purpuralis* | ZYGMO860-14 | Male | Austria | MK931119 |
| *Zygaena purpuralis* | ZYGMO861-14 | Male | Italy | MK931120 |
| *Zygaena purpuralis* | ZYGMO863-14 | Female | Bosnia and Herzegovina | MK931069 |
| *Zygaena purpuralis* | ZYGMO867-14 | Male | Serbia | MK931073 |
| *Zygaena purpuralis* | ZYGMO869-14 | Female | Austria | MK931074 |
| *Zygaena purpuralis* | ZYGMO871-14 | Male | Greece | MK931076 |
| *Zygaena purpuralis* | ZYGMO872-14 | Female | Italy | MK931077 |
| *Zygaena purpuralis* | ZYGMO878-14 | Male | Italy | MK931082 |
| *Zygaena purpuralis* | ZYGMO879-14 | Female | Italy | MK931083 |
| *Zygaena purpuralis* | ZYGMO893-14 | Male | Turkey | MK931092 |
| *Zygaena purpuralis* | ZYGMO894-14 | Female | Turkey | MK931093 |
| *Zygaena purpuralis* | ZYGMO895-14 | Male | Turkey | MK931094 |
| *Zygaena purpuralis* | ZYGMO896-14 | Male | Italy | MK931095 |
| *Zygaena purpuralis* | ZYGMO897-14 | Male | Italy | MK931096 |
| *Zygaena purpuralis* | ZYGMO898-14 | Male | Italy | MK931097 |
| *Zygaena purpuralis* | ZYGMO899-14 | Male | Italy | MK931098 |
| *Zygaena purpuralis* | ZYGMO900-14 | Female | Italy | MK931099 |
| *Zygaena purpuralis* | ZYGMO901-14 | Female | Italy | MK931100 |
| *Zygaena purpuralis* | ZYGMO902-14 | Male | Italy | MK931101 |
| *Zygaena purpuralis* | ZYGMO904-14 | Male | Serbia | MK931103 |
| *Zygaena purpuralis* | ZYGMO905-14 | Male | Serbia | MK931104 |
| *Zygaena purpuralis* | ZYGMO907-14 | Female | Serbia | MK931105 |
| *Zygaena purpuralis* | ZYGMO909-14 | Female | Montenegro | MK931107 |
| *Zygaena purpuralis* | ZYGMO914-14 | Male | Macedonia | MK931127 |
| *Zygaena purpuralis* | ZYGMO915-14 | Male | Macedonia | MK931128 |
| *Zygaena purpuralis* | ZYGMO916-14 | Male | Macedonia | MK931129 |
| *Zygaena purpuralis* | ZYGMO917-14 | Male | Serbia | MK931130 |
| *Zygaena purpuralis* | ZYGMO919-14 | Male | Turkey | MK931131 |
| *Zygaena purpuralis* | ZYGMO920-14 | Male | Turkey | MK931132 |
| *Zygaena purpuralis* | ZYGMO932-14 | Male | Greece | MK931137 |
| *Zygaena purpuralis* | ZYGMO933-14 | Male | Macedonia | MK931138 |
| *Zygaena purpuralis* | ZYGMO934-14 | Male | Macedonia | MK931139 |
| *Zygaena purpuralis* | ZYGMO935-14 | Male | Macedonia | MK931121 |
| *Zygaena purpuralis* | ZYGMO936-14 | Female | Serbia | MK931122 |
| *Zygaena purpuralis* | ZYGMO937-14 | Female | Montenegro | MK931123 |
| *Zygaena purpuralis* | ZYGMO938-14 | Male | Macedonia | MK931124 |
| *Zygaena purpuralis* | ZYGMO939-14 | Male | Macedonia | MK931125 |
| *Zygaena purpuralis* | ZYGMO941-14 | Female | Serbia | MK931126 |
| *Zygaena purpuralis* | ZYGMO942-14 | Female | Serbia | MK931111 |
| *Zygaena purpuralis* | ZYGMO943-14 | Female | Serbia | MK931112 |
| *Zygaena purpuralis* | ZYGMO944-14 | Female | Macedonia | MK931110 |
| *Zygaena purpuralis* | ZYGMO947-14 | Male | Macedonia | MK931136 |
| *Zygaena purpuralis* | ZYGMO948-14 | Male | Macedonia | MK931135 |
| *Zygaena purpuralis* | ZYGMO950-14 | Female | Macedonia | MK931109 |
| *Zygaena romeo* | ZYGMO1150-15 | Male | Italy | MK931141 |
| *Zygaena romeo* | ZYGMO1149-15 | Male | Italy | MK931142 |
| *Zygaena romeo* | ZYGMO1148-15 | Male | Italy | MK931140 |
| *Zygaena rubicundus* | ZYGMO927-14 | Male | Italy | MK931145 |
| *Zygaena rubicundus* | ZYGMO926-14 | Male | Italy | MK931144 |
| *Zygaena rubicundus* | ZYGMO925-14 | Male | Italy | MK931143 |
| *Zygaena sedi* | ZYGMO170-09 | Male | Crimea | GU705724 |
| *Zygaena sedi* | ZYGMO169-09 | Male | Crimea | GU705723 |
| *Zygaena sedi* | ZYGMO168-09 | Female | Crimea | GU705725 |
| *Zygaena tamara* | ZYGMO360-10 | Male | Armenia | HQ987513 |
| *Zygaena tamara* | ZYGMO359-10 | Male | Armenia | HQ987512 |
| *Zygaena transalpina* | ZYGMO544-12 | Male | Italy | KX043033 |
| *Zygaena transalpina* | ZYGMO545-12 | Female | Italy | KX043594 |
| *Zygaena transalpina* | ZYGMO546-12 | Female | Italy | KX043825 |
| *Zygaena transalpina* | ZYGMO547-12 | Female | Italy | KX042900 |
| *Zygaena transalpina* | ZYGMO548-12 | Male | Italy | KX043211 |
| *Zygaena transalpina* | ZYGMO549-12 | Male | Italy | KX043617 |
| *Zygaena transalpina* | ZYGMO550-12 | Male | Italy | KX043004 |
| *Zygaena transalpina* | ZYGMO551-12 | Female | Italy | KX043021 |
| *Zygaena transalpina* | ZYGMO552-12 | Male | Italy | KX044098 |
| *Zygaena transalpina* | ZYGMO553-12 | Male | Italy | KX042933 |
| *Zygaena transalpina* | ZYGMO554-12 | Male | Italy | KX044124 |
| *Zygaena transalpina* | ZYGMO555-12 | Male | Italy | KX043784 |
| *Zygaena transalpina* | ZYGMO556-12 | Female | Italy | KX043867 |
| *Zygaena transalpina* | ZYGMO557-12 | Female | Italy | KX043954 |
| *Zygaena trifolii* | ZYGMO475-10 | Male | Spain | MK931147 |
| *Zygaena trifolii* | ZYGMO474-10 | Male | Spain | HQ987607 |
| *Zygaena viciae* | ZYGMO173-09 | Male | Crimea | GU705719 |
| *Zygaena viciae* | ZYGMO1052-14 | Female | Macedonia | MK931149 |
| *Zygaena viciae* | ZYGMO176-09 | Female | Crimea | GU705776 |
| *Zygaena viciae* | ZYGMO1051-14 | Male | Macedonia | MK931148 |
| *Zygaena viciae* | ZYGMO175-09 | Female | Crimea | GU705717 |
| *Zygaena viciae* | ZYGMO174-09 | Female | Crimea | GU705720 |
| *Zygaenoprocris chalcochlora* | ZYGMO1203-15 | Male | Afghanistan | MK931151 |
| *Zygaenoprocris chalcochlora* | ZYGMO048-09 | Female | Afghanistan | GU705681 |
| *Zygaenoprocris chalcochlora* | ZYGMO046-09 | Male | Afghanistan | GU705682 |
| *Zygaenoprocris chalcochlora* | ZYGMO047-09 | Male | Afghanistan | GU705680 |
| *Zygaenoprocris chalcochlora* | ZYGMO1200-15 | Male | Afghanistan | MK931159 |
| *Zygaenoprocris chalcochlora* | ZYGMO1199-15 | Male | Afghanistan | MK931158 |
| *Zygaenoprocris chalcochlora* | ZYGMO1201-15 | Male | Afghanistan | MK931160 |
| *Zygaenoprocris chalcochlora* | ZYGMO541-12 | Female | Iran | MK931156 |
| *Zygaenoprocris chalcochlora* | ZYGMO520-12 | Male | Iran | MK931152 |
| *Zygaenoprocris chalcochlora* | ZYGMO539-12 | Female | Iran | MK931155 |
| *Zygaenoprocris chalcochlora* | ZYGMO538-12 | Female | Iran | MK931154 |
| *Zygaenoprocris chalcochlora* | ZYGMO521-12 | Male | Iran | MK931153 |
| *Zygaenoprocris chalcochlora* | ZYGMO1202-15 | Male | Afghanistan | MK931161 |
| *Zygaenoprocris chalcochlora* | ZYGMO1198-15 | Male | Afghanistan | MK931157 |
| *Zygaenoprocris duskei* | ZYGMO518-12 | Female | Iran | MK931162 |
| *Zygaenoprocris duskei* | ZYGMO235-10 | Male | Iran | HQ584928 |
| *Zygaenoprocris duskei* | ZYGMO234-10 | Male | Iran | HQ584927 |
| *Zygaenoprocris duskei* | ZYGMO042-09 | Male | Iran | HM417799 |
| *Zygaenoprocris duskei* | ZYGMO044-09 | Female | Iran | GU705780 |
| *Zygaenoprocris duskei* | ZYGMO043-09 | Male | Iran | GU705779 |
| *Zygaenoprocris duskei* | ZYGMO040-09 | Female | Iran | GU705778 |
| *Zygaenoprocris duskei* | ZYGMO039-09 | Male | Iran | GU705777 |
| *Zygaenoprocris duskei* | ZYGMO037-09 | Male | Iran | GU705683 |
| *Zygaenoprocris duskei* | ZYGMO038-09 | Male | Iran | GU705684 |
| *Zygaenoprocris eberti* | ZYGMO663-13 | Male | Afghanistan | MK931163 |
| *Zygaenoprocris eberti* | ZYGMO662-13 | Male | Afghanistan | MK931165 |
| *Zygaenoprocris eberti* | ZYGMO661-13 | Male | Afghanistan | MK931164 |
| *Zygaenoprocris efetovi* | ZYGMO050-09 | Male | Iran | GU705781 |
| *Zygaenoprocris efetovi* | ZYGMO049-09 | Male | Iran | GU705679 |
| *Zygaenoprocris fredi* | ZYGMO236-10 | Male | Iran | HQ584929 |
| *Zygaenoprocris hofmanni* | ZYGMO053-09 | Male | Iran | GU705678 |
| *Zygaenoprocris hofmanni* | ZYGMO052-09 | Male | Iran | GU705677 |
| *Zygaenoprocris khorassana* | ZYGMO540-12 | Male | Iran | MK931170 |
| *Zygaenoprocris khorassana* | ZYGMO523-12 | Female | Iran | MK931168 |
| *Zygaenoprocris khorassana* | ZYGMO339-10 | Male | Iran | HQ987511 |
| *Zygaenoprocris khorassana* | ZYGMO522-12 | Male | Iran | MK931169 |
| *Zygaenoprocris minna* | ZYGMO294-10 | Female | Turkmenistan | HQ987490 |
| *Zygaenoprocris persepolis* | ZYGMO032-09 | Male | Iran | GU705690 |
| *Zygaenoprocris persepolis* | ZYGMO033-09 | Male | Iran | GU705687 |
| *Zygaenoprocris persepolis* | ZYGMO034-09 | Male | Iran | GU705688 |
| *Zygaenoprocris persepolis* | ZYGMO035-09 | Male | Iran | GU705685 |
| *Zygaenoprocris persepolis* | ZYGMO036-09 | Male | Iran | GU705686 |
| *Zygaenoprocris persepolis* | ZYGMO1188-15 | Male | Iran | MK931177 |
| *Zygaenoprocris persepolis* | ZYGMO1189-15 | Male | Iran | MK931180 |
| *Zygaenoprocris persepolis* | ZYGMO1190-15 | Male | Iran | MK931171 |
| *Zygaenoprocris persepolis* | ZYGMO1191-15 | Male | Iran | MK931172 |
| *Zygaenoprocris persepolis* | ZYGMO1192-15 | Male | Iran | MK931173 |
| *Zygaenoprocris persepolis* | ZYGMO1193-15 | Male | Iran | MK931174 |
| *Zygaenoprocris persepolis* | ZYGMO1194-15 | Male | Iran | MK931175 |
| *Zygaenoprocris persepolis* | ZYGMO1195-15 | Male | Iran | MK931176 |
| *Zygaenoprocris persepolis* | ZYGMO516-12 | Male | Iran | MK931178 |
| *Zygaenoprocris persepolis* | ZYGMO517-12 | Female | Iran | MK931179 |
| *Zygaenoprocris rjabovi* | ZYGMO296-10 | Female | Iran | HQ987492 |
| *Zygaenoprocris rjabovi* | ZYGMO295-10 | Male | Iran | HQ987491 |
| *Zygaenoprocris taftana* | ZYGMO515-12 | Female | Iran | MK931181 |
| *Zygaenoprocris taftana* | ZYGMO031-09 | Male | Armenia | GU705689 |
| *Zygaenoprocris taftana* | ZYGMO030-09 | Male | Armenia | GU705692 |
| *Zygaenoprocris taftana* | ZYGMO029-09 | Male | Armenia | GU705691 |
| *Zygaenoprocris taftana* | ZYGMO028-09 | Male | Armenia | GU705694 |
| *Zygaenoprocris taftana* | ZYGMO027-09 | Male | Armenia | GU705693 |
| *Zygaenoprocris taftana* | ZYGMO514-12 | Male | Iran | MK931182 |
